# Supplementary material for: Understanding the anchoring and catalytic effect of the Co@C2N monolayer in lithium–selenium batteries: a first-principles study
Source: Royal Society of Chemistry journal article supplement (doi:10.1039/d1nr03406e), 2021-01-01
Supplement: d1nr03406e1.pdf [file d1nr03406e1.pdf]

## **Supporting Information**

for

### **Understanding the anchoring and catalytic effect of Co@C<sub>2</sub>N monolayer in Lithium-selenium Batteries: A first-principles study**

Shuwei Tang<sup>\*a</sup>, Chenchen Liu,<sup>a</sup> Wen Sun,<sup>a</sup> Xu Zhang,<sup>a</sup> Ding Shen,<sup>a</sup> Wei Dong,<sup>a</sup>  
Shaobin Yang<sup>a</sup>

<sup>a</sup>College of Materials Science and Engineering, Liaoning Technical University,  
Zhonghua Road No. 47, Fuxin, Liaoning 123000, China

Corresponding author:

E-mail: tangsw911@nenu.edu.cn

Table S1. Adsorbed structures and binding energies ( $E_b$ ) of  $\text{Se}_8$  and  $\text{Li}_2\text{Se}_n$  ( $n=1, 2, 4, 6$ , and  $8$ ) at different lithiation stages on the surface of  $\text{Co@C}_2\text{N}$  in different positions. Monkhorst-Pack grids are set to Gamma point, other methods and computational details are shown in the main article.

| $E_b$<br>structures | $\text{Li}_2\text{Se-Co@C}_2\text{N}$                                               | $\text{Li}_2\text{Se}_2\text{-Co@C}_2\text{N}$                                      | $\text{Li}_2\text{Se}_4\text{-Co@C}_2\text{N}$                                        | $\text{Li}_2\text{Se}_6\text{-Co@C}_2\text{N}$                                        | $\text{Li}_2\text{Se}_8\text{-Co@C}_2\text{N}$                                        | $\text{Se}_8\text{-Co@C}_2\text{N}$                                                   |
|---------------------|-------------------------------------------------------------------------------------|-------------------------------------------------------------------------------------|---------------------------------------------------------------------------------------|---------------------------------------------------------------------------------------|---------------------------------------------------------------------------------------|---------------------------------------------------------------------------------------|
|                     | 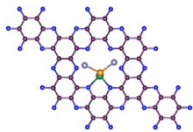   |    |    |    |    |    |
|                     | $E_b = 3.7 \text{ eV}$                                                              | $E_b = 2.47 \text{ eV}$                                                             | $E_b = 1.87 \text{ eV}$                                                               | $E_b = 1.79 \text{ eV}$                                                               | $E_b = 1.19 \text{ eV}$                                                               | $E_b = 1.04 \text{ eV}$                                                               |
|                     |    |    |    |    |    |    |
|                     | $E_b = 2.28 \text{ eV}$                                                             | $E_b = 2.16 \text{ eV}$                                                             | $E_b = 1.82 \text{ eV}$                                                               | $E_b = 1.58 \text{ eV}$                                                               | $E_b = 0.94 \text{ eV}$                                                               | $E_b = 0.93 \text{ eV}$                                                               |
|                     |   |   |   |   |   |   |
|                     | $E_b = 0.89 \text{ eV}$                                                             | $E_b = 1.97 \text{ eV}$                                                             | $E_b = 1.29 \text{ eV}$                                                               | $E_b = 1.56 \text{ eV}$                                                               | $E_b = 0.57 \text{ eV}$                                                               | $E_b = 0.89 \text{ eV}$                                                               |
|                     |  |  |  |  |  |  |
|                     | $E_b = 0.80 \text{ eV}$                                                             | $E_b = 0.95 \text{ eV}$                                                             | $E_b = 0.85 \text{ eV}$                                                               | $E_b = 1.53 \text{ eV}$                                                               | $E_b = 0.52 \text{ eV}$                                                               | $E_b = 0.71 \text{ eV}$                                                               |

|  |                                                                                     |                                                                                     |                                                                                     |                                                                                                                                      |
|--|-------------------------------------------------------------------------------------|-------------------------------------------------------------------------------------|-------------------------------------------------------------------------------------|--------------------------------------------------------------------------------------------------------------------------------------|
|  | 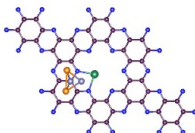   |  |  |                                                   |
|  | $E_b = 0.61 \text{ eV}$                                                             | $E_b = 0.56 \text{ eV}$                                                             | $E_b = 1.47 \text{ eV}$                                                             | $E_b = 0.37 \text{ eV}$                                                                                                              |
|  |  |  |  | <div><div>●</div> C</div> <div><div>●</div> N</div> <div><div>●</div> Co</div> <div><div>●</div> Li</div> <div><div>●</div> Se</div> |
|  | $E_b = 0.51 \text{ eV}$                                                             | $E_b = 1.14 \text{ eV}$                                                             | $E_b = 0.04 \text{ eV}$                                                             |                                                                                                                                      |
